# Supplementary material
Source: Elsevier journal article supplement (https://www.sciencedirect.com/science/article/pii/S234128792300056X)
Supplement: mmc1 [file S234128792300056X:mmc1.doc]

**Material suplementario.**

**Comparación de las escalas de sedación, analgesia y síndrome de abstinencia el día antes de la introducción de la ketamina y el propofol (día 0) y cada uno de los días después de la introducción de la ketamina y el propofol.**

| **Escala** | **Día 0**  MAPS n=26  COMFB n=29  SOPHIA n=19 | **Día 1**  MAPS n=26  COMFB n=28  SOPHIA n=24 | | **Día 2**  MAPS n=26  COMFB n=28  SOPHIA n=20 | | **Día 3**  MAPS n=26  COMFB n=26  SOPHIA n=18 | | **Día 4**  MAPS n=26  COMFB n=22  SOPHIA n=21 | | **Día 5**  MAPS n=26  COMFB n=14  SOPHIA n=15 | |
| --- | --- | --- | --- | --- | --- | --- | --- | --- | --- | --- | --- |
|  |  | ***P*** |  | ***P*** |  | ***P*** |  | ***P*** |  | ***P*** |
| **MAPS** | 1 (0-1,2) | 1 (1-2) | 0,17 | 1 (0-2) | 0,11 | 1 (2,3) | 0,95 | 1.2  (0-2,5) | 0,41 | 1 (0-2) | 0,59 |
| **COMFORT-B** | 12 (10-14) | 15  (12-17) | 0,01* | 14  (11.8-16) | 0,025* | 14 (5) | 0,029* | 15  (13-17) | 0,002* | 15  (13,3-16,3) | 0,003* |
| **SOPHIA** | 0 (0-2) | 1 (0-2,4) | 0,10 | 1 (1-2) | 0,64 | 1 (0-2) | 0,44 | 1 (0-2,8) | 0,28 | 0 (0-2) | 0,50 |

**P<0,05.*

MAPS:Multidimensional Assessment Pain Scale

Los datos se muestran en forma de mediana y rango intercuartílico.
